# Supplementary material for: N–H⋯π hydrogen-bonding and large-amplitude tipping vibrations in jet-cooled pyrrole–benzene
Source: Royal Society of Chemistry journal article supplement (doi:10.1039/c1cp20793h), 2011-01-01
Supplement: c1cp20793h.pdf [file c1cp20793h.pdf]

**Electronic Supplementary Information for Article "N-H... $\pi$  hydrogen-bonding and large-amplitude tipping vibrations in jet-cooled pyrrole-benzene"**

by

Chantal Pfaffen, Daniel Infanger, Philipp Ottiger, Hans-Martin Frey and Samuel Leutwyler

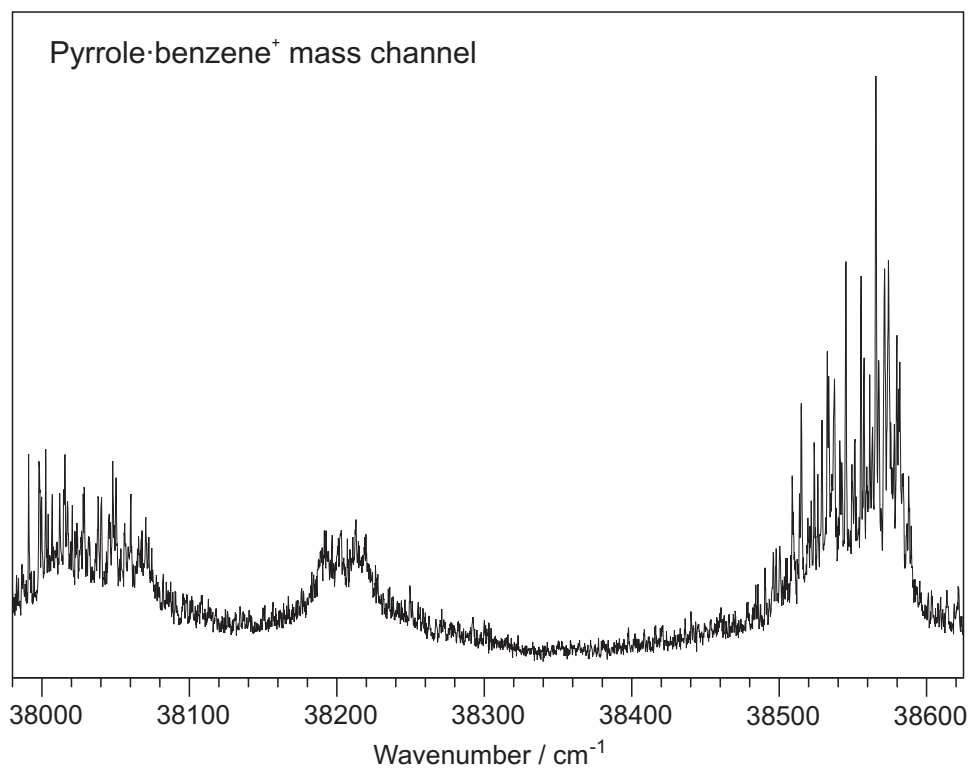

FIG. 1. One-color resonant two-photon ionization spectrum measured in the pyrrole-benzene mass channel.
